# Supplementary material for: Designing of a novel heterogeneous nanocatalyst ZIF-4@HAp for solvent free base catalyzed esterification reaction
Source: Royal Society of Chemistry journal article supplement (doi:10.1039/d4re00026a), 2024-01-01
Supplement: d4re00026a1.pdf [file d4re00026a1.pdf]

## Supporting Information

### **Designing of a novel heterogeneous nanocatalyst ZIF-4@HAp for solvent free base catalyzed esterification reaction**

Linkon Bharali, Debarati Chakraborty, Triveni, Juri Kalita, Siddhartha Sankar Dhar\* <sup>[a]</sup>

<sup>[a]</sup> Department of Chemistry, National Institute of Technology Silchar, Cachar, Assam- 788010, India.

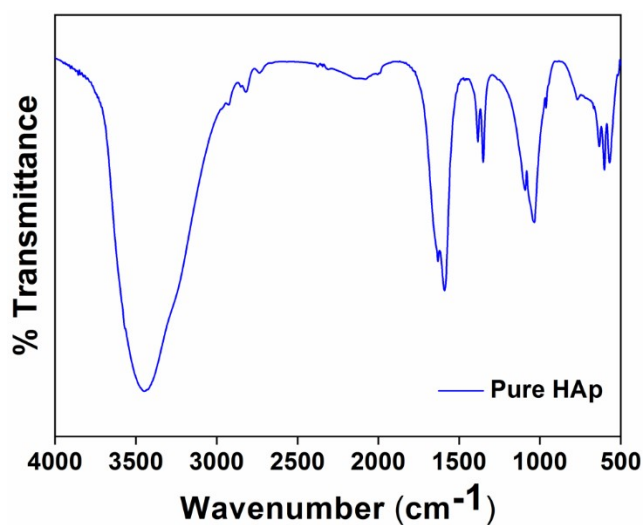

**Figure S1.** FT-IR Spectrum of Pure HAp

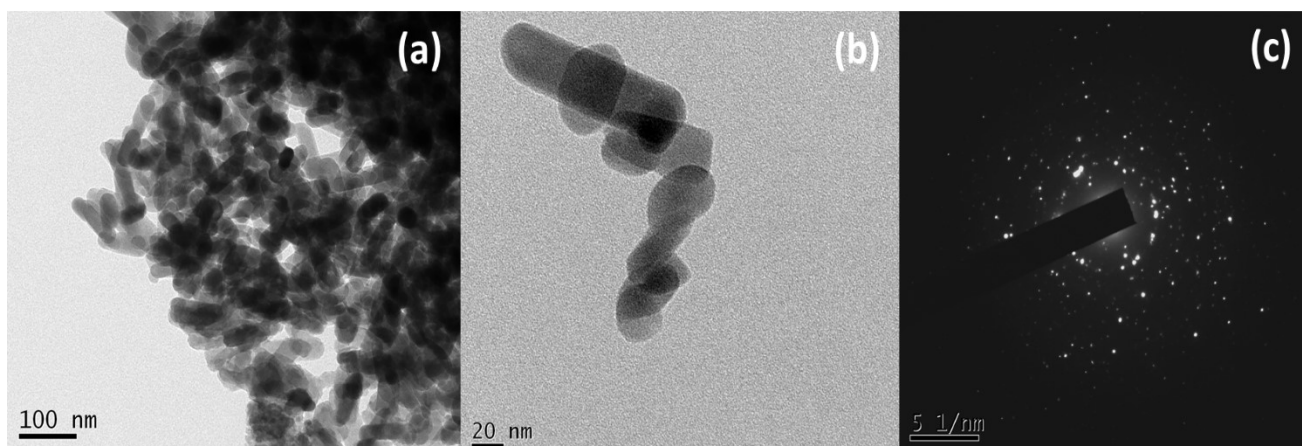

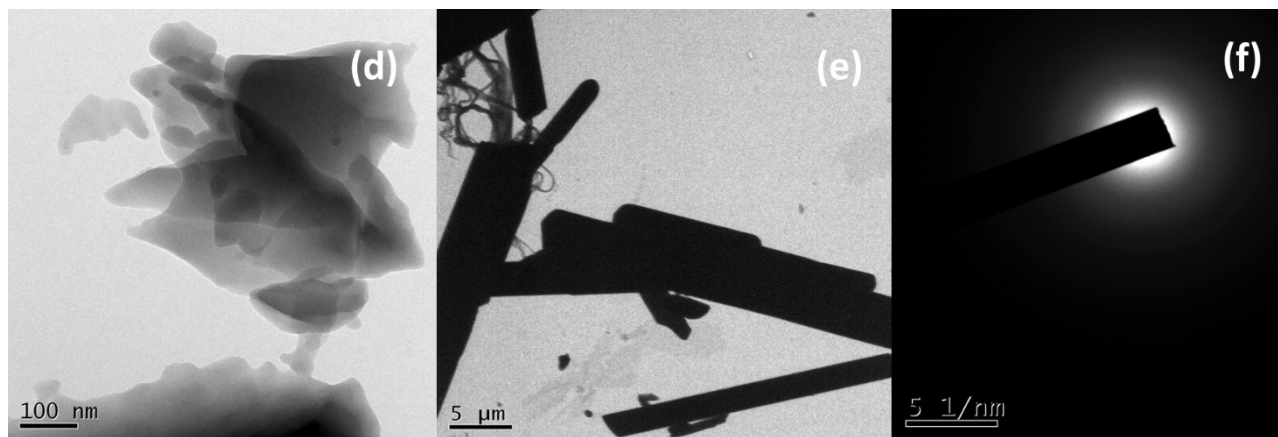

**Figure S2.** HR-TEM Images (a, b) Pure HAp and (d, e) ZIF-4 and SAED pattern of (c) pure HAp and (f) ZIF-4

**Table S1:** Values of surface area, pore volume, and pore diameter of pure HAp and as-synthesized catalyst:

| Sl No. | Photocatalyst | Surface area (m <sup>2</sup> /g) | Pore volume (cc/g) | Pore diameter (nm) |
|--------|---------------|----------------------------------|--------------------|--------------------|
| 1      | HAp           | 48.90                            | 0.091              | 18.240             |
| 2      | ZIF-4@HAp     | 60.36                            | 0.102              | 30.610             |

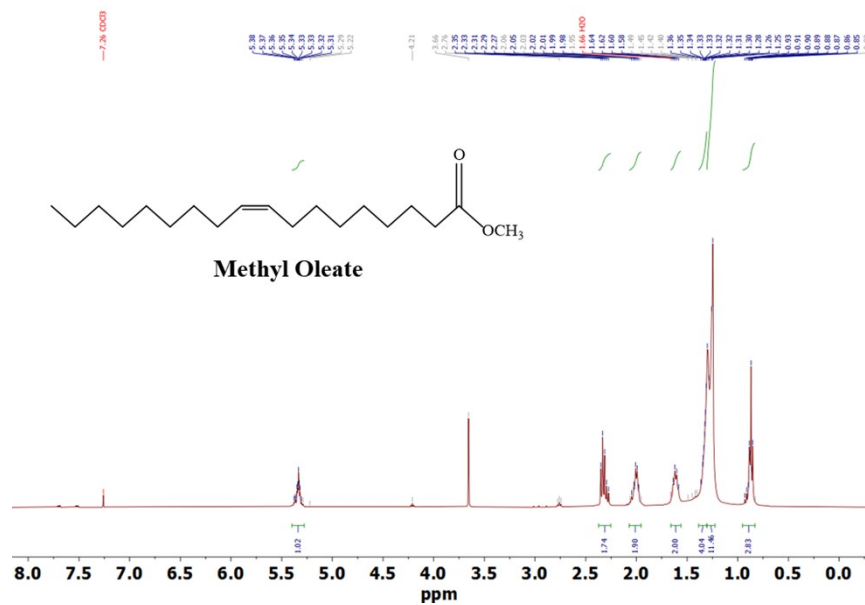

**Figure S3.** <sup>1</sup>H NMR Spectrum of Methyl Oleate

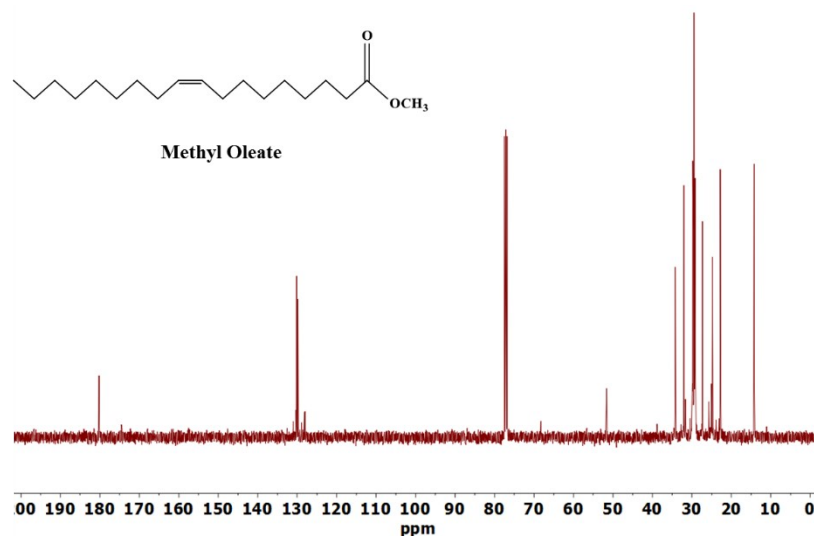

Figure S4.  $^{13}\text{C}$  NMR Spectrum of Methyl Oleate

$^1\text{H}$  NMR ( $\text{CHCl}_3$ , 400 MHz,  $\delta$  ppm): 3.66 (s, 3H), 1.27- 2.70 (m, 14H), 2.31 (t, 2H), 0.87 (t, 3H), 5.34 (d, 1H) and  $^{13}\text{C}$  NMR ( $\text{CHCl}_3$ , 100 MHz,  $\delta$  ppm): 180.2, 130.13, 77.48, 51.59, 34.27, 32.09, 29.51, 27.33, 25.15, 24.77, 22.91, 14.21.

Table S2: Optimization of Methyl Oleate formation

| Entry | Catalyst Amount (mg) | Reactants  |          | Product       | Temperature (°C) | Time (h) | % Yield |
|-------|----------------------|------------|----------|---------------|------------------|----------|---------|
|       |                      | Acid       | Alcohol  |               |                  |          |         |
| 1     | 20                   | Oleic Acid | Methanol | Methyl Oleate | RT               | 7        | -       |
| 2     | 40                   | Oleic Acid | Methanol | Methyl Oleate | 40               | 2        | 40.8    |
| 3     | 40                   | Oleic Acid | Methanol | Methyl Oleate | 50               | 2        | 72.5    |
| 4     | 40                   | Oleic Acid | Methanol | Methyl Oleate | 60               | 2        | 90.4    |

(Optimum Reaction Condition: ZIF-4@HAp catalyst: 40 mg, acid: 10 mmol, alcohol: 60 mmol, Reaction Temperature: 60 °C, Reaction Time: 2 h)

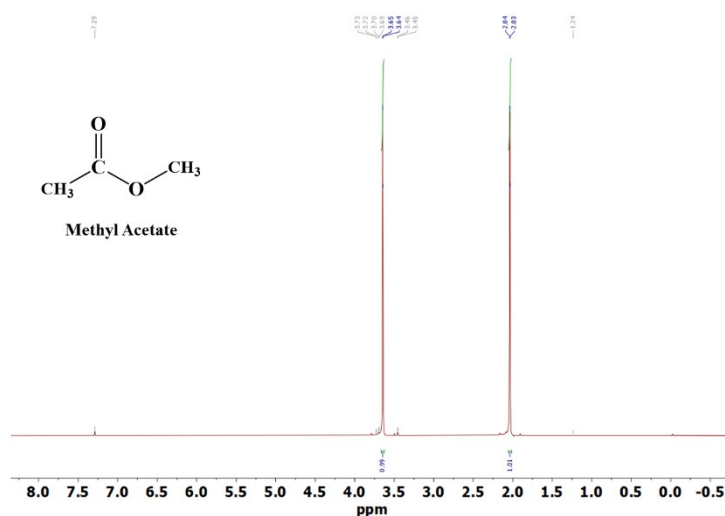

Figure S5.  $^1\text{H}$  NMR Spectrum of Methyl Acetate

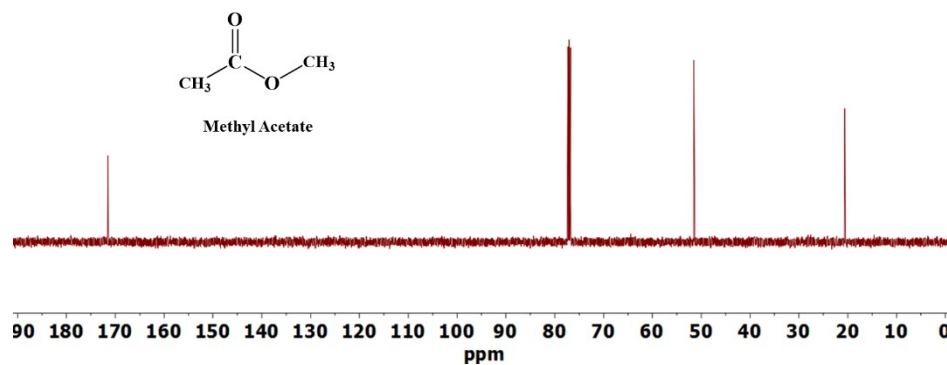

Figure S6.  $^{13}\text{C}$  NMR Spectrum of Methyl Acetate

$^1\text{H}$  NMR ( $\text{CHCl}_3$ , 500 MHz,  $\delta$  ppm): 3.64 (s, 1H), 2.04 (s, 1H) and  $^{13}\text{C}$  NMR ( $\text{CHCl}_3$ , 125 MHz,  $\delta$  ppm): 171.5, 77.06, 51.53, and 20.6.

Table S3: Optimization of Methyl Acetate formation

| Entry | Catalyst Amount (mg) | Reactants   |          | Product        | Temperature ( $^{\circ}\text{C}$ ) | Time (h) | % Yield |
|-------|----------------------|-------------|----------|----------------|------------------------------------|----------|---------|
|       |                      | Acid        | Alcohol  |                |                                    |          |         |
| 1     | 20                   | Acetic Acid | Methanol | Methyl Acetate | RT                                 | 7        | -       |
| 2     | 40                   | Acetic Acid | Methanol | Methyl Acetate | 40                                 | 2        | 33.6    |
| 3     | 40                   | Acetic Acid | Methanol | Methyl Acetate | 50                                 | 2        | 67.2    |
| 4     | 40                   | Acetic Acid | Methanol | Methyl Acetate | 60                                 | 2        | 91.7    |

(Optimum Reaction Condition: ZIF-4@HAp catalyst: 40 mg, acid: 10 mmol, alcohol: 60 mmol, Reaction Temperature: 60  $^{\circ}\text{C}$ , Reaction Time: 2 h)

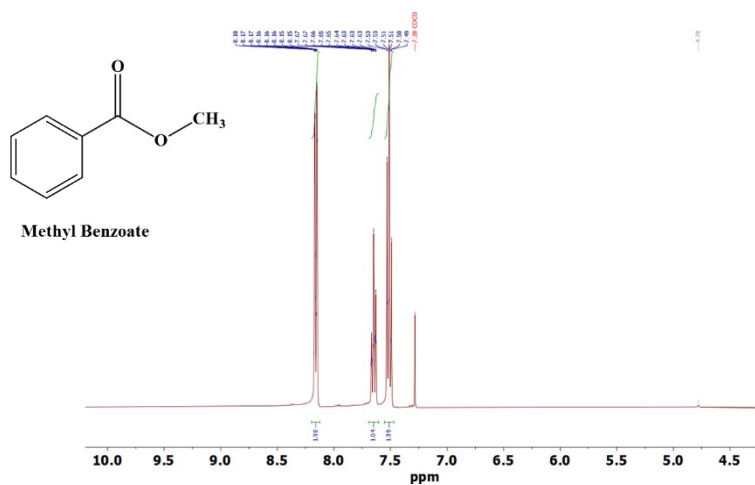

Figure S7.  $^1\text{H}$  NMR Spectrum of Methyl Benzoate

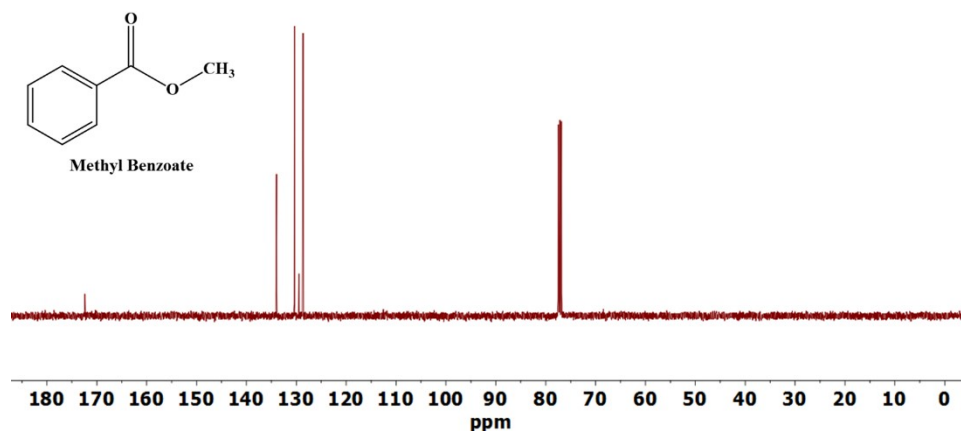

Figure S8. <sup>13</sup>C NMR Spectrum of Methyl Benzoate

<sup>1</sup>H NMR (CHCl<sub>3</sub>, 400 MHz, δ ppm): 8.16 (d, 2H), 7.64 (t, 1H), 7.51 (t, 2H), 4.78 (s, 3H) and <sup>13</sup>C NMR (CHCl<sub>3</sub>, 100 MHz, δ ppm): 172.39, 133.96, 130.37, 128.9, 76.84.

Table S4: Optimization of Methyl Benzoate formation

| Entry | Catalyst Amount (mg) | Reactants    |          | Product         | Temperature (°C) | Time (h) | % Yield |
|-------|----------------------|--------------|----------|-----------------|------------------|----------|---------|
|       |                      | Acid         | Alcohol  |                 |                  |          |         |
| 1     | 20                   | Benzoic Acid | Methanol | Methyl Benzoate | RT               | 7        | -       |
| 2     | 30                   | Benzoic Acid | Methanol | Methyl Benzoate | 40               | 2        | 42.6    |
| 3     | 35                   | Benzoic Acid | Methanol | Methyl Benzoate | 45               | 2        | 78.3    |
| 4     | 35                   | Benzoic Acid | Methanol | Methyl Benzoate | 50               | 2        | 94.5    |

(Optimum Reaction Condition: ZIF-4@HAp catalyst: 35 mg, acid: 10 mmol, alcohol: 60 mmol, Reaction Temperature: 50 °C, Reaction Time: 2 h)

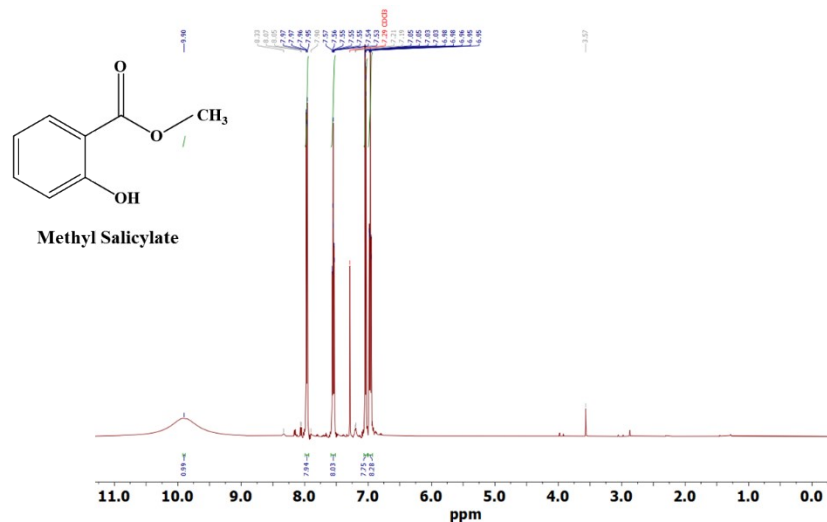

Figure S9. <sup>1</sup>H NMR Spectrum of Methyl Salicylate

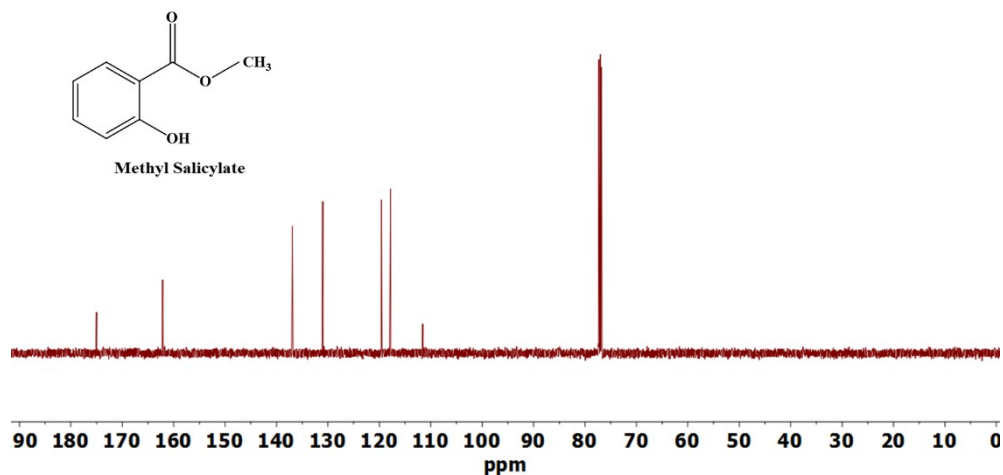

**Figure S10.**  $^{13}\text{C}$  NMR Spectrum of Methyl Salicylate

$^1\text{H}$  NMR ( $\text{CHCl}_3$ , 400 MHz,  $\delta$  ppm): 3.57 (s, 3H), 7.96 (d, 1H), 7.55 (t, 1H), 7.04 (d, 1H), 6.97 (t, 1H), 3.57 (s, 3H), 9.90 (s, 1H) and  $^{13}\text{C}$  NMR ( $\text{CHCl}_3$ , 100 MHz,  $\delta$  ppm): 175, 162.14, 136.91, 131.1, 119.61, 117.82, 77.29.

**Table S5:** Optimization of Methyl Salicylate formation

| Entry | Catalyst Amount (mg) | Reactants      |          | Product           | Temperature ( $^{\circ}\text{C}$ ) | Time (h) | % Yield |
|-------|----------------------|----------------|----------|-------------------|------------------------------------|----------|---------|
|       |                      | Acid           | Alcohol  |                   |                                    |          |         |
| 1     | 20                   | Salicylic Acid | Methanol | Methyl Salicylate | RT                                 | 7        | -       |
| 2     | 30                   | Salicylic Acid | Methanol | Methyl Salicylate | 40                                 | 2        | 44.8    |
| 3     | 35                   | Salicylic Acid | Methanol | Methyl Salicylate | 45                                 | 2        | 83.7    |
| 4     | 35                   | Salicylic Acid | Methanol | Methyl Salicylate | 50                                 | 2        | 95.8    |

(Optimum Reaction Condition: ZIF-4@HAp catalyst: 35 mg, acid: 10 mmol, alcohol: 60 mmol, Reaction Temperature: 50  $^{\circ}\text{C}$ , Reaction Time: 2 h)

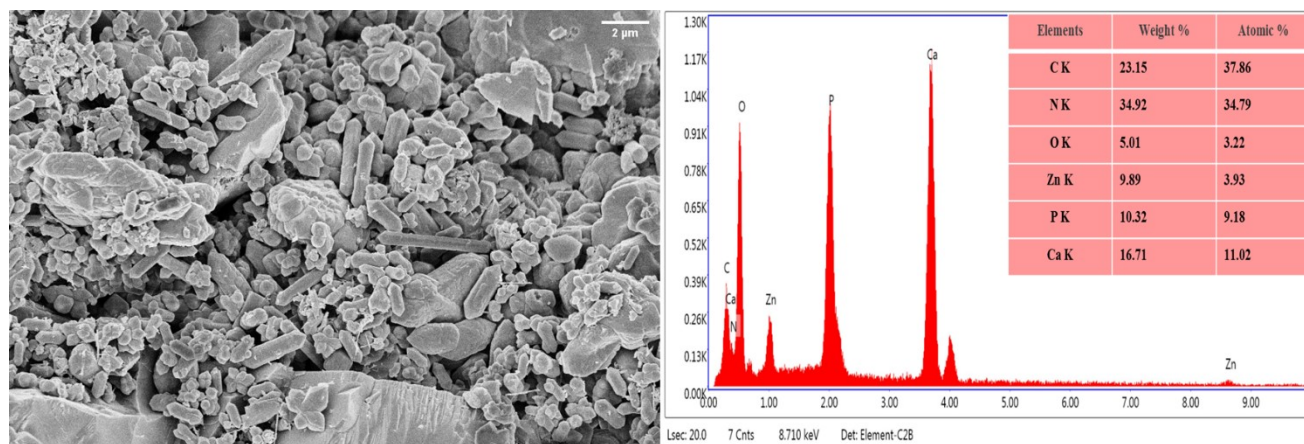

Figure S11. SEM-Image and EDS Spectrum of Reused Catalyst

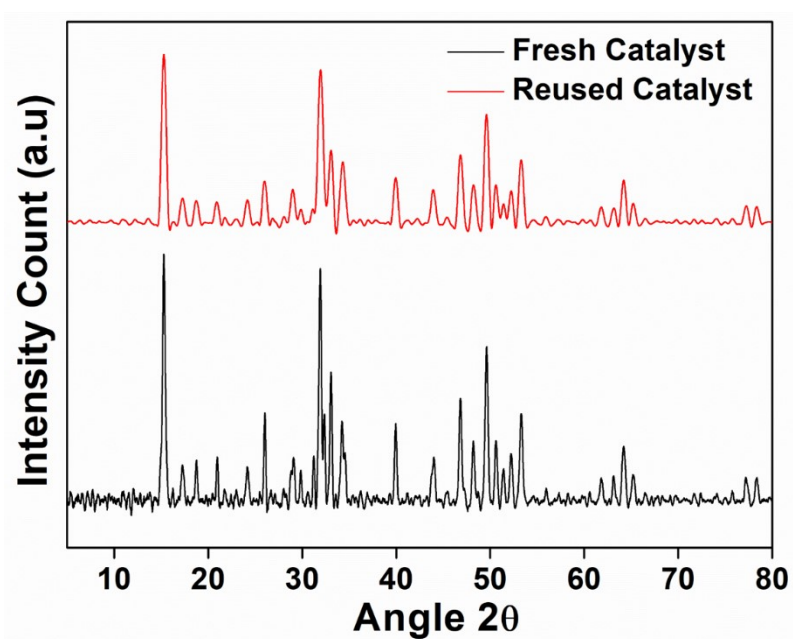

Figure S12. PXRD Spectra of fresh and reused catalyst, ZIF-4@HAp
